# Supplementary material
Source: publisher figshare collection journal article supplement (https://acs.figshare.com/ndownloader/files/9579721)
Supplement: Supplementary file 1 [file 9579721]

# Supporting Information

## **N,S,P Co-Doped Carbon Nanodot Fabricated from Waste Microorganism and Its Application for Label-Free Recognition of Manganese(VII) and L-Ascorbic Acid and AND Logic Gate Operation**

*Xiaojuan Gong<sup>a,‡,\*</sup>, Zengbo Li<sup>a,‡</sup>, Qin Hu<sup>b</sup>, Ruixin Zhou<sup>a</sup>, Shaomin Shuang<sup>a</sup>, Chuan Dong<sup>a,\*</sup>*

<sup>a</sup>Institute of Environmental Science, and School of Chemistry and Chemical Engineering, Shanxi University, Taiyuan, 030006 (P. R. China)

<sup>b</sup>Department of Chemistry, State University of New York at Buffalo, Buffalo, NY 14260, USA

\*Corresponding author. Tel: +86-351-7011011; fax: +86-351-7011011.

E-mail addresses: gxj1124@sxu.edu.cn (X.G.), dc@sxu.edu.cn. (C.D.)

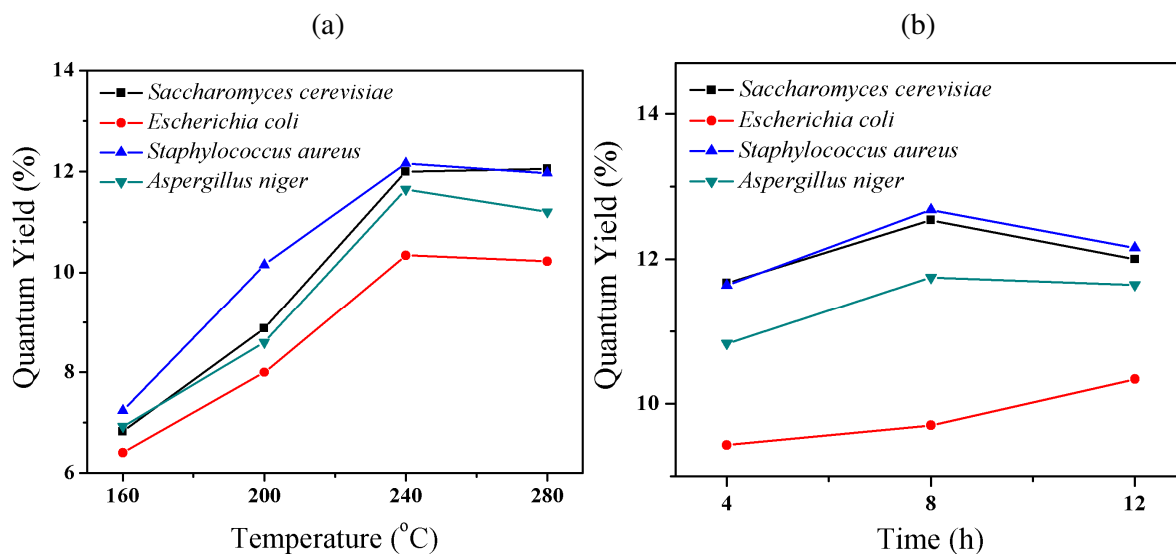

Figure S1. Effect of (a) reaction temperature and (b) reaction time on the quantum yield of N,S,P-CNDs fabricated by different kinds of microorganisms.

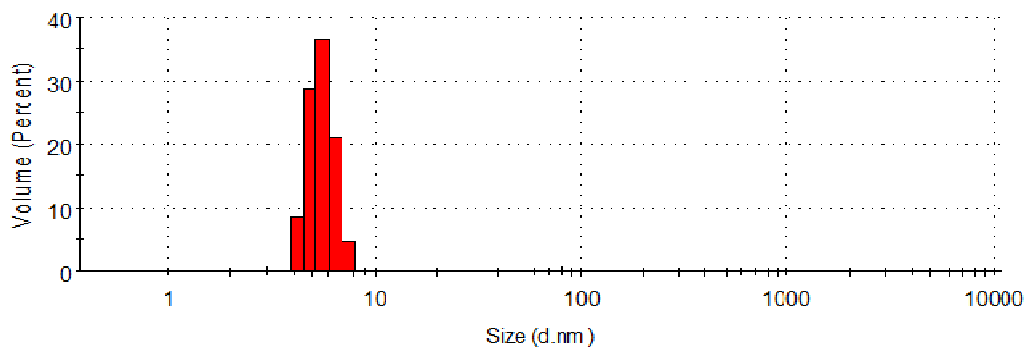

Figure S2. Size distribution histogram obtained from DLS measurement of N,S,P-CND<sub>Sac</sub> in aqueous solution.

Table S1. Elemental analysis of the as-fabricated N,S,P-CND<sub>Sac</sub>: (a) elemental content and (b) relative number of atom in N,S,P-CND<sub>Sac</sub>.

(a)

| Sample name              | Elemental content (weight %) |      |       |      |      |                |
|--------------------------|------------------------------|------|-------|------|------|----------------|
|                          | C                            | H    | N     | S    | P    | O (calculated) |
| N,S,P-CND <sub>Sac</sub> | 18.91                        | 7.25 | 17.85 | 4.26 | 5.51 | 16.22          |

(b)

| Sample name              | Relative number of atom |     |    |   |   |    | Empirical formula                                                                              |
|--------------------------|-------------------------|-----|----|---|---|----|------------------------------------------------------------------------------------------------|
|                          | C                       | H   | N  | S | P | O  |                                                                                                |
| N,S,P-CND <sub>Sac</sub> | 24                      | 109 | 19 | 2 | 3 | 43 | C <sub>24</sub> H <sub>109</sub> N <sub>19</sub> S <sub>2</sub> P <sub>3</sub> O <sub>43</sub> |

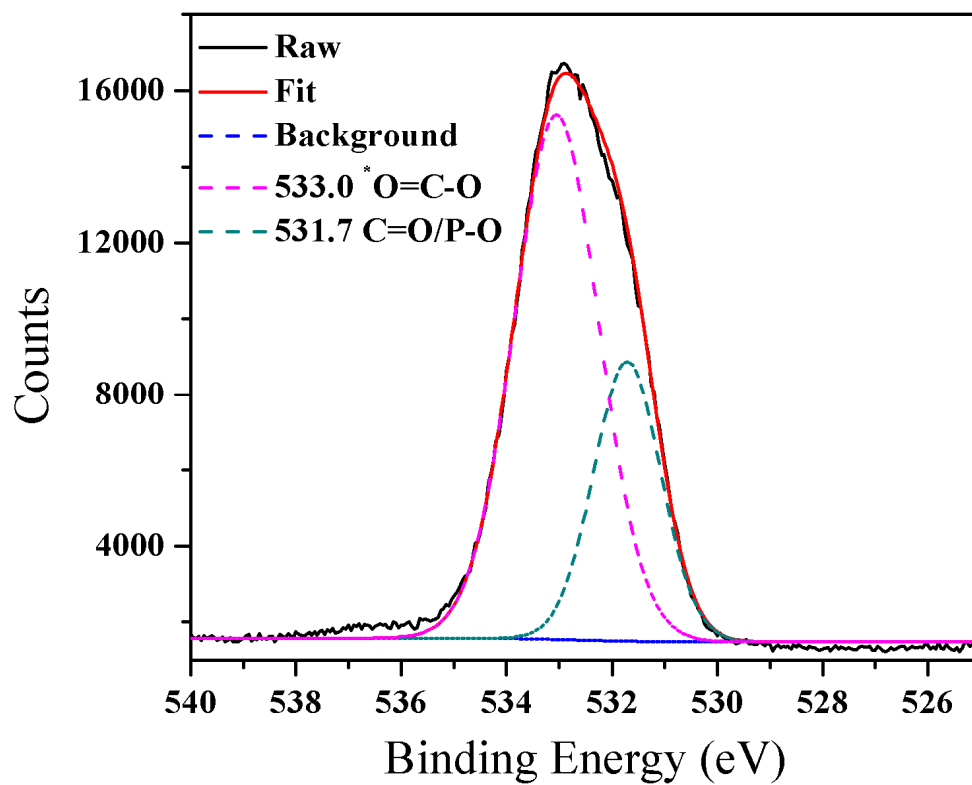

Figure S3. O 1s XPS of N,S,P-CND<sub>Sac</sub>.

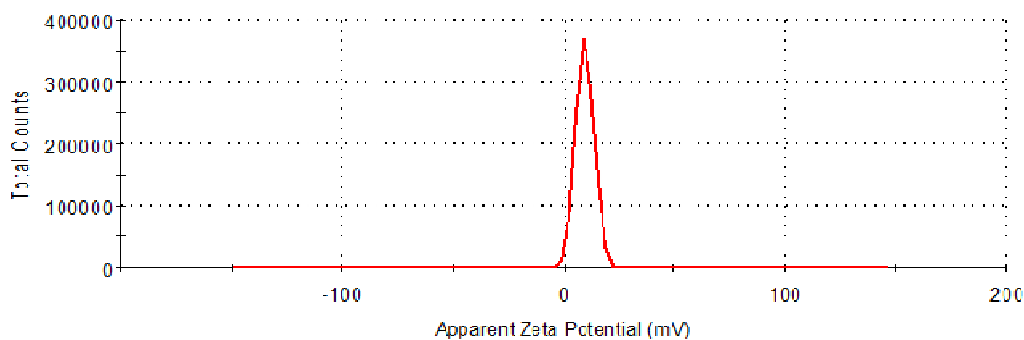

Figure S4. Zeta potential of N,S,P-CND<sub>Sac</sub>.

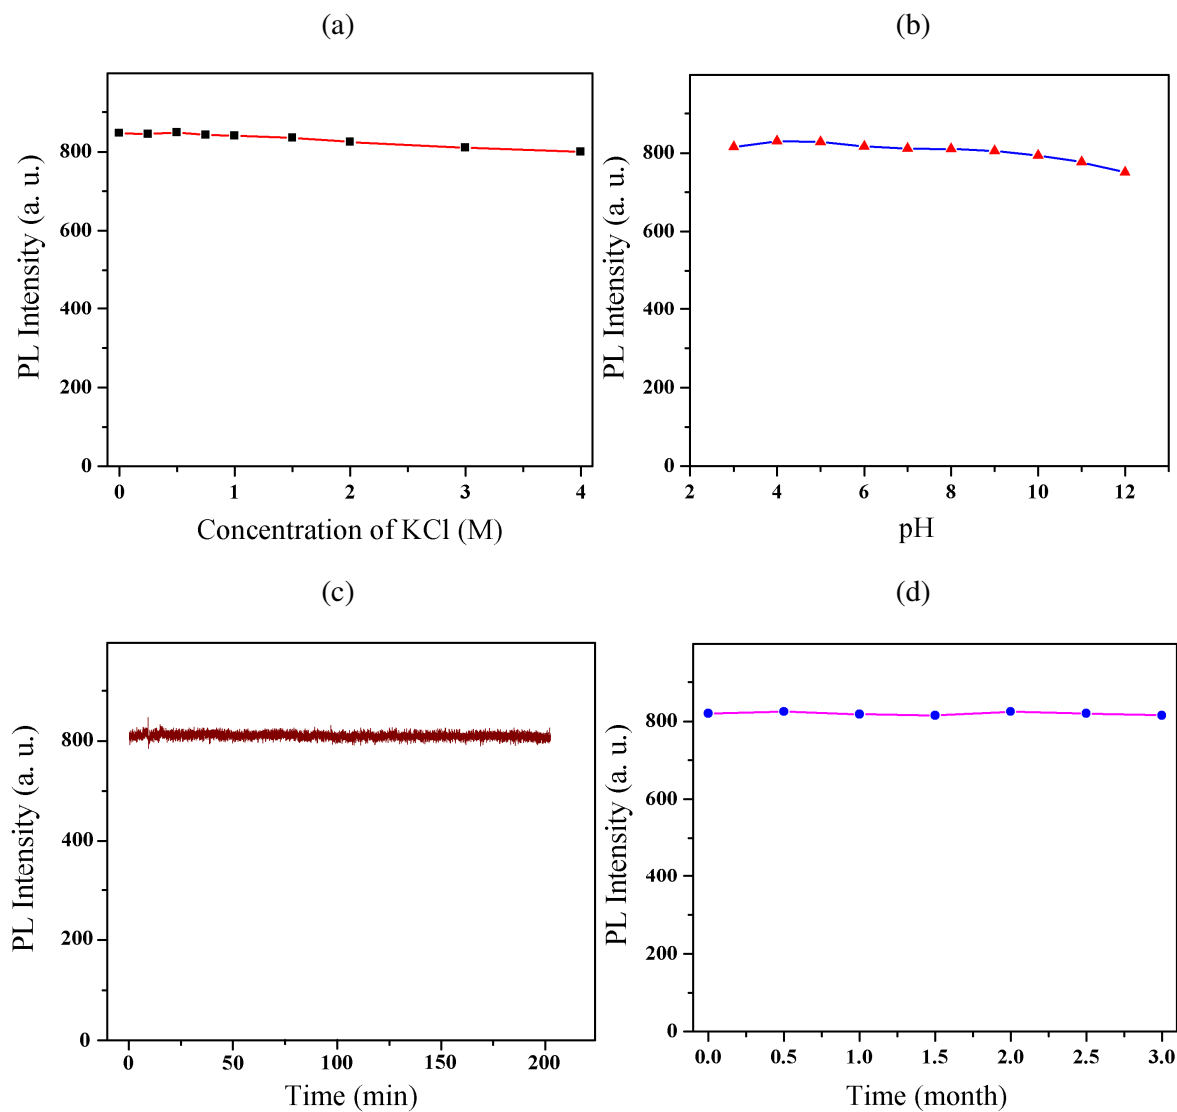

Figure S5. Effect of (a) ionic strength, (b) pH, (c) Xe lamp irradiation time and (d) storage time in room temperature on the fluorescence intensity of N,S,P-CND<sub>Sac</sub> aqueous (0.1 mg/mL).

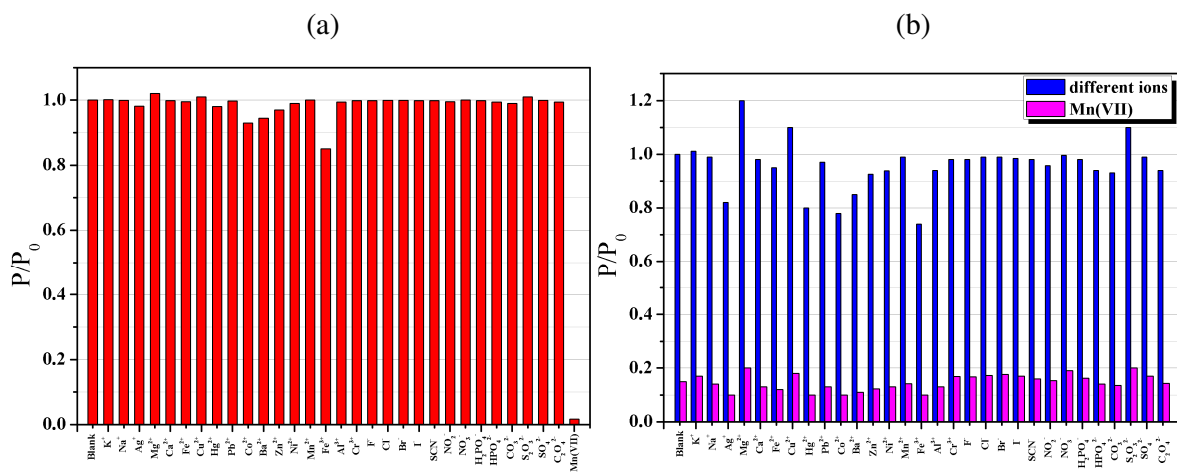

Figure S6. (a) Comparison of fluorescence intensity of N,S,P-CND<sub>Sac</sub> (0.1 mg/mL) after the addition of Mn(VII) (0.5 mmol/L) or other different metal ions (0.5 mmol/L) or anion ions (0.5 mmol/L). (b) Comparison of fluorescence intensity of N,S,P-CND<sub>Sac</sub> (0.1 mg/mL) after the addition of Mn(VII) (0.1 mmol/L) and other different metal ions (10 mmol/L) or anion ions (10 mmol/L).

Table S2. Double-exponential fitting of N,S,P-CND<sub>Sac</sub> and N,S,P-CND<sub>Sac</sub>/Mn(VII) decay curves.

| Sample name                 | N,S,P-CND <sub>Sac</sub> | N,S,P-CND <sub>Sac</sub> /Mn(VII) |
|-----------------------------|--------------------------|-----------------------------------|
| $\tau_1(\text{ns})/A_1(\%)$ | 3.52/56.01               | 3.56/58.00                        |
| $\tau_2(\text{ns})/A_2(\%)$ | 10.00/43.99              | 10.21/42.00                       |
| Average $\tau$ (ns)         | 6.37                     | 6.36                              |

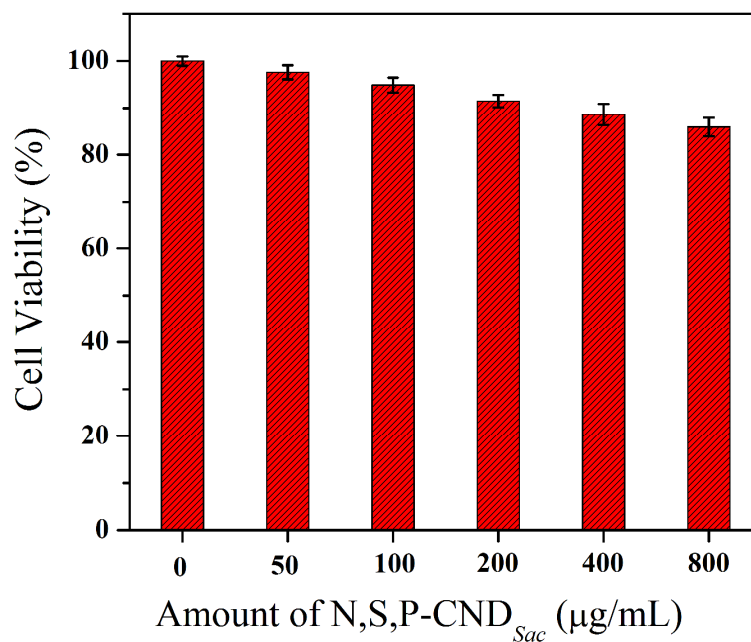

Figure S7. Cell viability test of N,S,P-CND<sub>Sac</sub> on HepG2 cells. The values represent percentage cell viability (mean%  $\pm$  SD,  $n = 6$ ).

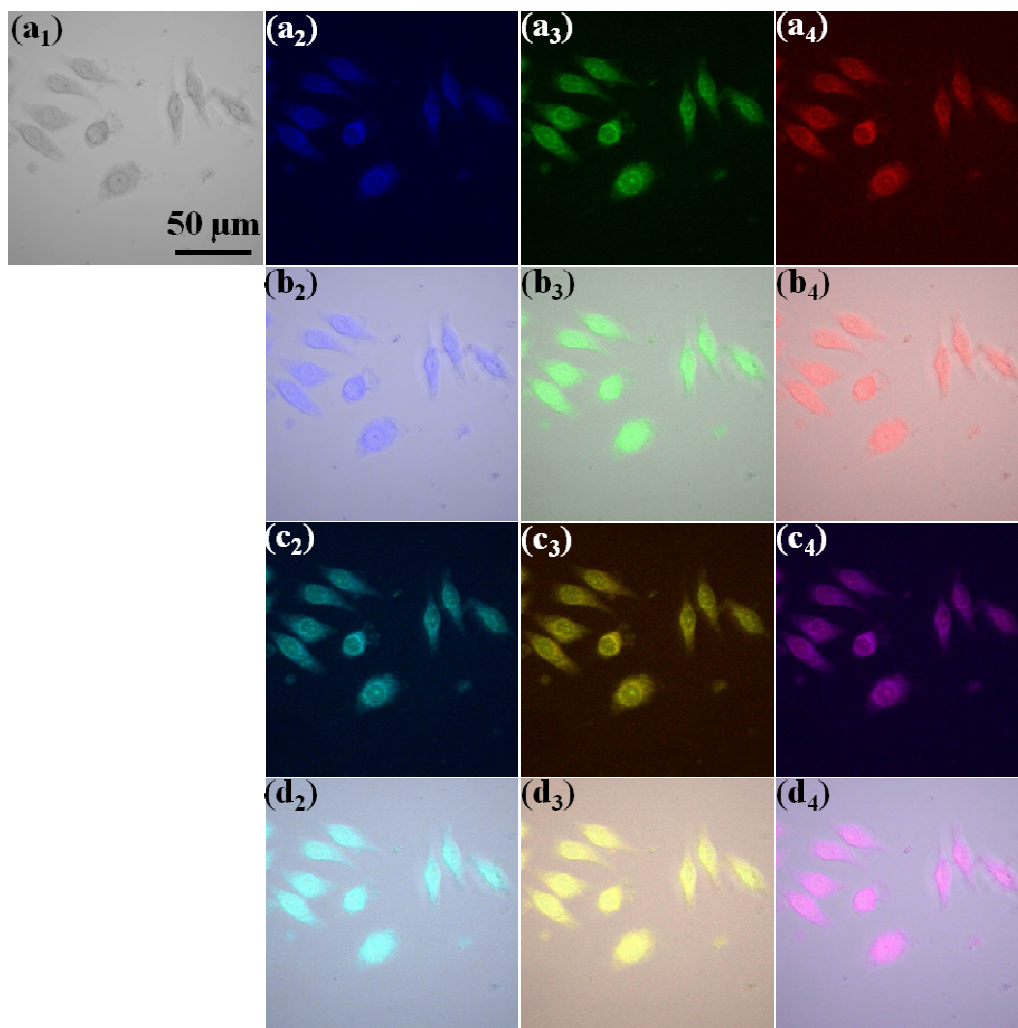

Figure S8. LSCM images of HepG2 cells incubated with 0.5 mg/mL N,S,P-CND<sub>Sac</sub> at 37 °C for 4h. (a<sub>1</sub>) shows the bright-field images of HepG2 cells. (a<sub>2</sub>), (a<sub>3</sub>) and (a<sub>4</sub>) are cell images taken at  $\lambda_{ex}/\lambda_{em}$  of  $405/422 \pm 25$ ,  $488/500 \pm 25$  and  $543/650 \pm 25$  nm, respectively. (b<sub>2</sub>), (b<sub>3</sub>) and (b<sub>4</sub>) are the merged images of (a<sub>1</sub>) and (a<sub>2</sub>), (a<sub>1</sub>) and (a<sub>3</sub>), and (a<sub>1</sub>) and (a<sub>4</sub>), respectively. (c<sub>2</sub>), (c<sub>3</sub>) and (c<sub>4</sub>) are the merged images of (a<sub>2</sub>) and (a<sub>3</sub>), (a<sub>3</sub>) and (a<sub>4</sub>), and (a<sub>2</sub>) and (a<sub>4</sub>), respectively. (d<sub>2</sub>), (d<sub>3</sub>) and (d<sub>4</sub>) are the merged images of (a<sub>1</sub>) and (c<sub>2</sub>), (a<sub>1</sub>) and (c<sub>3</sub>), and (a<sub>1</sub>) and (c<sub>4</sub>), respectively.
